# Supplementary material for: Advancing neodymium single-band nanothermometry
Source: Royal Society of Chemistry journal article supplement (doi:10.1039/c9nr02801c), 2019-01-01
Supplement: c9nr02801c1.pdf [file c9nr02801c1.pdf]

## Advancing neodymium single-band nanothermometry

Artiom Skripka, Alexandre Morinvil, Marija Matulionyte, Ting Cheng and Fiorenzo Vetrone\*

Centre Énergie, Matériaux et Télécommunications, Institut National de la Recherche Scientifique,  
Université du Québec, 1650 Boul. Lionel-Boulet, Varennes, QC, J3X 1S2, Canada

Corresponding author: [\\*vetrone@emt.inrs.ca](mailto:*vetrone@emt.inrs.ca)

## Table of Contents

|                                                                                                                    |           |
|--------------------------------------------------------------------------------------------------------------------|-----------|
| <b>Experimental</b> .....                                                                                          | <b>2</b>  |
| Precursor preparation .....                                                                                        | 2         |
| RENP synthesis .....                                                                                               | 2         |
| RENP transfer to water .....                                                                                       | 3         |
| Structural characterization .....                                                                                  | 3         |
| Optical characterization .....                                                                                     | 4         |
| Thermosensitivity characterization .....                                                                           | 4         |
| Ex vivo experiments.....                                                                                           | 5         |
| <b>TEM images of LiLuF<sub>4</sub>: x mol% Nd<sup>3+</sup>/LiLuF<sub>4</sub> (LiYF<sub>4</sub>) RENPs</b> .....    | <b>7</b>  |
| <b>XRD patterns of LiLuF<sub>4</sub>: x mol% Nd<sup>3+</sup>/LiLuF<sub>4</sub> (LiYF<sub>4</sub>) RENPs</b> .....  | <b>8</b>  |
| <b>Attempted LiGdF<sub>4</sub> shelling</b> .....                                                                  | <b>9</b>  |
| <b>PL spectra of LiLuF<sub>4</sub>: x mol% Nd<sup>3+</sup>/LiLuF<sub>4</sub> (LiYF<sub>4</sub>) RENPs</b> .....    | <b>10</b> |
| <b>Comparison of S<sub>r</sub></b> .....                                                                           | <b>11</b> |
| <b>S<sub>r</sub> of pure PL ratio nanothermometer</b> .....                                                        | <b>12</b> |
| <b>Quantum efficiency of NIR detector</b> .....                                                                    | <b>14</b> |
| <b>Repeatability of RENPs as NIR nanothermometers</b> .....                                                        | <b>15</b> |
| <b>Invariability of 1050 nm emission</b> .....                                                                     | <b>16</b> |
| <b>S<sub>r</sub> of LiLuF<sub>4</sub>: x mol% Nd<sup>3+</sup>/LiLuF<sub>4</sub> (LiYF<sub>4</sub>) RENPs</b> ..... | <b>17</b> |
| <b>PL transmission through pork fat tissue</b> .....                                                               | <b>18</b> |
| <b>Heating-cooling characterization</b> .....                                                                      | <b>20</b> |
| <b>References</b> .....                                                                                            | <b>21</b> |

## Experimental

### *Materials*

Lu<sub>2</sub>O<sub>3</sub> (REacton, 99.9%), Nd<sub>2</sub>O<sub>3</sub> (REacton, 99.999%), Y<sub>2</sub>O<sub>3</sub> (REacton, 99.999%), trifluoroacetic acid (99%), 1-octadecene (ODE, 90%), and oleic acid (OA, 90%) were purchased from Alfa Aesar (USA). Lithium trifluoroacetate (97%) and oleylamine (OM, 70%) were obtained from Sigma-Aldrich (USA). All chemicals were used without further purification.

### *Precursor preparation*

Rare earth (RE) trifluoroacetate precursors (1 mmol) for the synthesis of LiLuF<sub>4</sub>:Nd<sup>3+</sup> core RENPs of different Nd<sup>3+</sup> doping (1, 2.5 and 5 %) were prepared by mixing stoichiometric quantities of Lu<sub>2</sub>O<sub>3</sub> and Nd<sub>2</sub>O<sub>3</sub> (total amount of oxides corresponding to 0.5 mmol) in each case with 5 mL trifluoroacetic acid and 5 mL of water in 100 mL three-neck round bottom flasks. The mixtures were refluxed under vigorous stirring at 80 °C until the solutions became clear, at which point the temperature was decreased to 60 °C for residual trifluoroacetic acid and water to evaporate. Precursors for LiLuF<sub>4</sub>, LiYF<sub>4</sub>, or LiGdF<sub>4</sub> shells were prepared in analogous fashion, out of 1 mmol of Lu<sub>2</sub>O<sub>3</sub>, Y<sub>2</sub>O<sub>3</sub>, or Gd<sub>2</sub>O<sub>3</sub> respectively.

### *RENPs synthesis*

RENPs were prepared via modified two-step thermal decomposition method, synthesizing first nuclei (FN), which serve as seeds to form the desired core RENPs.<sup>[1]</sup>

FN formation: Dried RE trifluoroacetate precursors were mixed with 1.0 mmol of lithium trifluoroacetate, 5 mL each of OA and OM and 10 mL of ODE. Solution was degassed at 110 °C under vacuum and magnetic stirring for 30 min. After degassing, the solution was back-filled with Ar, the temperature was raised to 330 °C, and left to react for 1 h. Maintaining the Ar flow and stirring, the solution was then cooled to room temperature (RT).

Core synthesis: Core RENPs were formed by the stabilization of FN with excess of OA. FN (0.5 mmol, ~ 10 mL of stock solution) were mixed with 15 mL each of OA and ODE in a 100 mL three-neck round bottom flask. The solution was degassed at 110 °C under vacuum and magnetic stirring for 30 min. Then, back-filled with Ar and the temperature was raised to 330 °C, at which point reaction continued for 1 h. After cooling to RT, a small portion (0.5 mL) of core RENPs was sampled for characterization.



Core shelling: Core/shell RENPs were prepared by epitaxial growth of the shell on the preformed cores *via* the hot-injection approach. Approximately 0.1 mmol of core RENPs were mixed in 100 mL three-neck round bottom flask together with equal parts of OA and ODE up to a total volume of 20 mL (Solution A). Separately, Solution B was prepared by mixing approximately 0.25 mmol of desired RE shelling precursors together with 0.25 mmol of lithium trifluoroacetate, and 10 mL each of OA and ODE. Both solutions were degassed under vacuum and magnetic stirring at 110 °C for 30 min. After degassing, Solution A was back-filled with Ar and the temperature was raised to 315 °C. Solution B was then injected into the reaction vessel containing Solution A using a syringe and pump system (Harvard Apparatus Pump 11 Elite, USA) at a 1.5 mL/min injection rate. The mixture was left at a temperature of 315 °C under vigorous stirring for 60 min, at which point it was cooled to RT. Resultant core/shell RENPs were precipitated with ethanol, and washed sequentially with hexane/ethanol, toluene/acetone and hexane/ethanol (1/4 v/v in each case) *via* centrifugation (5400 RCF). Finally, RENPs were re-dispersed in hexane for further structural characterization and transfer to water.

#### *RENP transfer to water*

RENPs were transferred to water following ligand removal procedure.<sup>[2]</sup> Briefly, 10 mg of oleate-capped RENPs were mixed with 5 mL each of hexane and distilled water (pH ~ 3-4; adjusted with HCl) and left under vigorous stirring for 24 h at RT. Aqueous and organic phases were separated with the separatory funnel, and RENPs contained in the aqueous phase were precipitated with acetone *via* centrifugation (12000 RCF). The obtained pellet was re-dispersed in 5 mL of distilled water (pH ~ 3-4) and left stirring for an additional 3 h at RT. RENPs were then precipitated and washed twice with a mixture of water/acetone (1/4 v/v) *via* centrifugation. Finally, ligand-free RENPs were re-dispersed in distilled water, and used without further purification for optical and thermometric studies.

#### *Structural characterization*

The crystallinity and phase of the core and core/shell RENPs were determined *via* X-ray powder diffraction (XRD) analysis with a Bruker D8 Advance Diffractometer (USA) using CuK $\alpha$  radiation. The morphology and size distribution of the core and core/shell RENPs were investigated by transmission electron microscopy (TEM, Philips Tecnai 12, USA). The particle size was determined from TEM images using ImageJ image analysis software with set size of 500 to 1000 individual particles per sample.

*Optical characterization*

Near-infrared (NIR) photoluminescence (PL) of different RENPs was recorded under 793 nm laser diode excitation (CNI, China; 684 mW  $\approx$  49 W/cm<sup>2</sup>) with a Shamrock 500i monochromator (Andor, Ireland) equipped with an iDus InGaAs 1.7 NIR detector (Andor, Ireland). In order to remove any stray light from the excitation source long pass (LP) 830 nm filter (Semrock, Inc., USA) was used.

*Thermosensitivity characterization*

The thermal response of RENPs was measured in the 20 to 45 °C temperature ( $T$ ) range at 5 °C increments. The temperature was changed using a temperature controlled cuvette holder (qpod 2e by Quantum Northwest, Washington, USA). 10 min intervals were maintained between the measurements in order to reach thermal equilibrium at a set temperature. Nanothermometer characterizing parameters were calculated following the guidelines set by C. D. S. Brites et al.<sup>[3]</sup> PL intensity ratio (thermometric parameter -  $\Delta$ ) was estimated taking the ratio between the integrated intensities  $I_n$  and  $I_m$  ( $n$  and  $m$  indicate spectral parts for which the integration ranges were determined, see manuscript's main text and Fig. 2), at each temperature value:

$$\Delta = \frac{I_n}{I_m}$$

The relative thermal sensitivity ( $S_r$ ) of the RENPs was calculated as:

$$S_r = \frac{1}{\Delta} \frac{\partial \Delta}{\partial T}$$

Selected LiLuF<sub>4</sub>: 2.5 mol% Nd<sup>3+</sup>/LiLuF<sub>4</sub> RENPs were further characterized in terms of their temperature uncertainty ( $\delta T$ ), repeatability ( $R$ ), and temporal uncertainty ( $\delta t$ ).

Temperature uncertainty,  $\delta T$ , was measured by performing 200 consecutive spectral measurements at a fixed temperature ( $T_s = 28$  °C).  $\delta T$  was then estimated as standard deviation from the measured valued.

Repeatability parameter,  $R$ , was calculated as:

$$R = 1 - \frac{\max(|\Delta_c - \Delta_i|)}{\Delta_c}$$

Where  $\Delta_c$  is the mean PL intensity ratio value extracted from the calibration curve and  $\Delta_i$  is that of each measurement for the repetitive heating-cooling cycles.

Temporal uncertainty,  $\delta t$ , of the RENPs was determined from the thermal relaxation curves obtained from *ex vivo* heating-cooling experiments, following the definition:

$$\delta t = \delta T / \left| \frac{\partial T}{\partial t} \right|_{\max}$$

Where  $|dT/dt|_{\max}$  is the maximum temperature change per unit of time.

#### *Ex vivo experiments*

NIR images were acquired with an InGaAs NIR imaging camera (XEVA-1781, Xenics, Belgium). NIR emission light was collected after passing through an 830, 980 or 1150 nm LP filter.

For PL transmission experiments (Scheme S1), an aqueous dispersion of RENPs (5 mg/mL) was excited with 793 nm light of 49 W/cm<sup>2</sup> power density, and the PL trace was imaged maintaining a 90° optical geometry between the excitation beam and the NIR camera objective. Pork fat tissue of various thicknesses (1 to 10 mm) was placed between the PL trace and NIR camera.

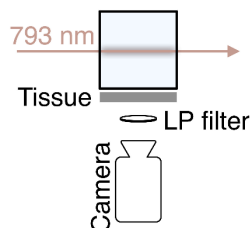

Scheme 1. Set-up of PL detection through pork fat tissue.

NIR imaging of glass capillary filled with an aqueous dispersion of RENPs (5 mg/mL) was done in a similar manner described above, this time also exciting RENPs through the tissue. A glass capillary (0.2 mm thick, 2 mm wide, with 0.15 mm wall thickness; Electron Microscopy Sciences, USA) containing RENPs was placed behind pork fat tissue of various thicknesses (1 to 5 mm). 793 nm laser (0.5 W/cm<sup>2</sup> impinging on the surface of the tissue) was used to excite the sample, and PL was collected with NIR camera placed in front of the tissue (Scheme 2).

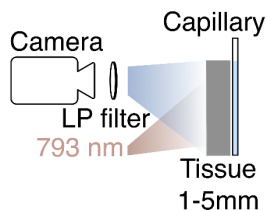

Scheme 2. Capillary imaging set-up through pork fat tissue.

Heating-cooling dynamics of an aqueous dispersion of RENPs (5 mg/mL) were measured irradiating the sample with 793 ( $\sim 49 \text{ W/cm}^2$ ) and 980 nm ( $\sim 37 \text{ W/cm}^2$ ) light, and placing the pork fat tissue of various thicknesses (1 to 5 mm) in front of the emission collecting lens (Scheme 3). The 793 nm laser was continuously exciting the RENPs for the duration of a single 12 min experiment. The PL (emission around 1050 nm:  $^4F_{3/2} \rightarrow ^4I_{11/2}$  transition and its thermometric parameter  $\Delta_2$ ) was used to spectrally determine the temperature in the vicinity of RENPs. Temperature increase was induced by simultaneously turning ON the 980 nm laser at the 2 min mark thereby heating the solution for 5 min after which it was switched OFF. Each measurement was repeated 5 times. A type K thermocouple (Mini-Hypodermic Probe, needle diameter of 0.2 mm; Omega, USA) connected to a type K handheld thermometer of 0.1 °C (HH306A; Omega, USA) was used for contact measurement of temperature change inside the cuvette.

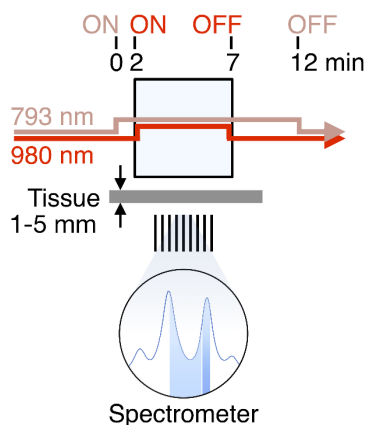

Scheme 3. Set-up of heating-cooling measurements through pork fat tissue.

**TEM images of  $\text{LiLuF}_4$ :  $x$  mol%  $\text{Nd}^{3+}$ / $\text{LiLuF}_4$  ( $\text{LiYF}_4$ ) RENPs**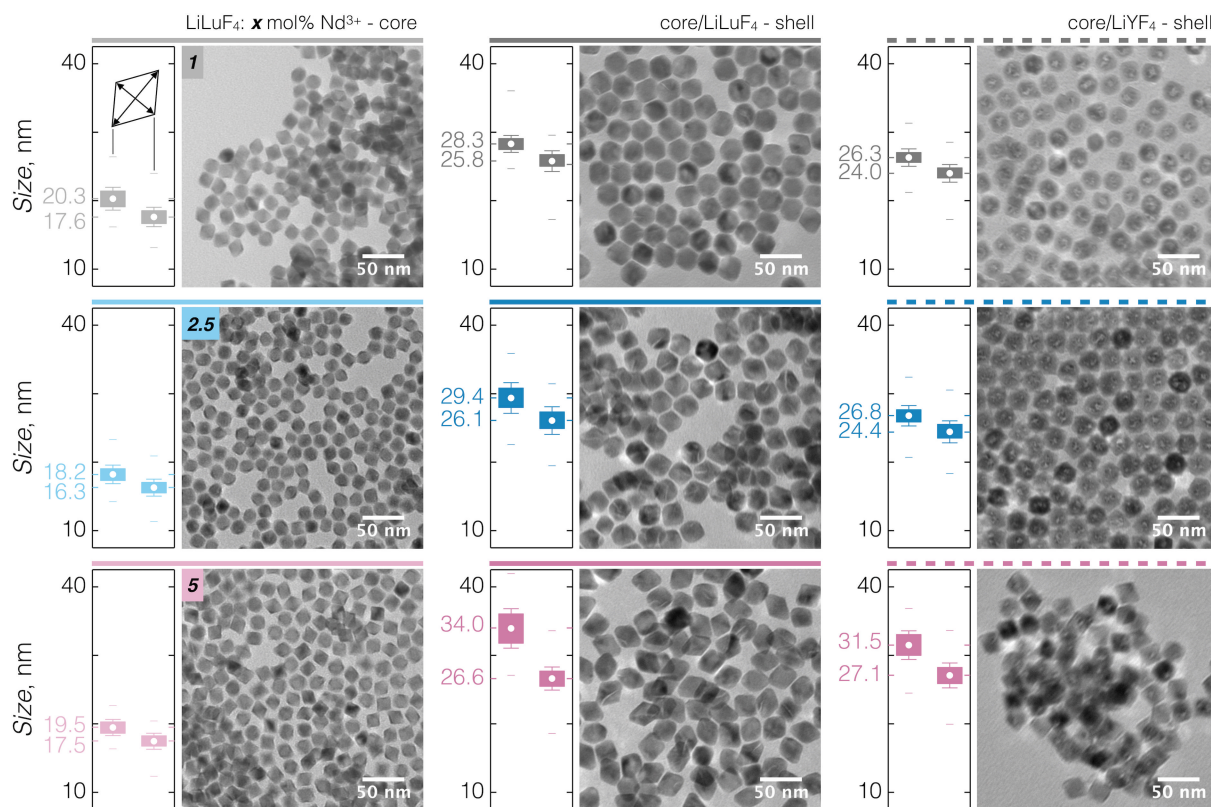

Figure S1. TEM images of  $\text{LiLuF}_4$ :  $x$  mol%  $\text{Nd}^{3+}$  - core and core/ $\text{LiLuF}_4$  ( $\text{LiYF}_4$ ) - shell RENPs and their respective size distribution measured along major and minor axes of an elliptical fit. Inset shows directions along which the size of the RENPs was measured. Box plots indicate: mean value (dot), 25<sup>th</sup> and 75<sup>th</sup> percentiles (box outline), SD (whiskers), and outliers (dashes).

**XRD patterns of  $\text{LiLuF}_4$ :  $x$  mol%  $\text{Nd}^{3+}/\text{LiLuF}_4$  ( $\text{LiYF}_4$ ) RENPs**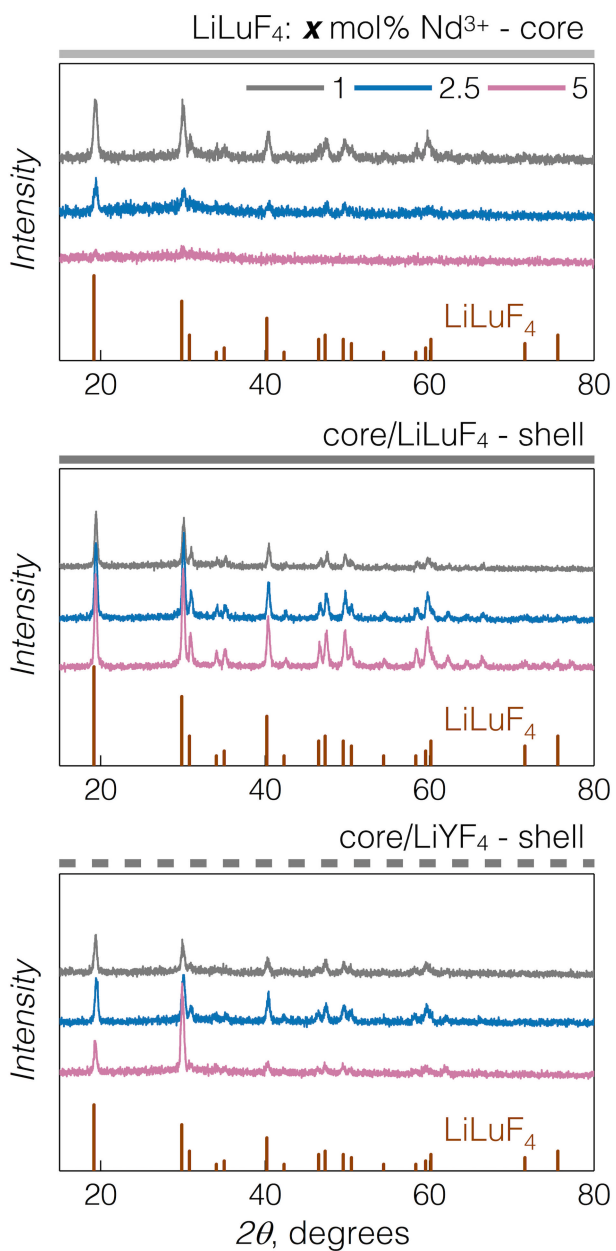

Figure S2. XRD patterns of  $\text{LiLuF}_4$ :  $x$  mol%  $\text{Nd}^{3+}$  - core and core/ $\text{LiLuF}_4$  ( $\text{LiYF}_4$ ) - shell RENPs, diffraction peaks of pure tetragonal  $\text{LiLuF}_4$  crystal are also shown.

**Attempted LiGdF<sub>4</sub> shelling**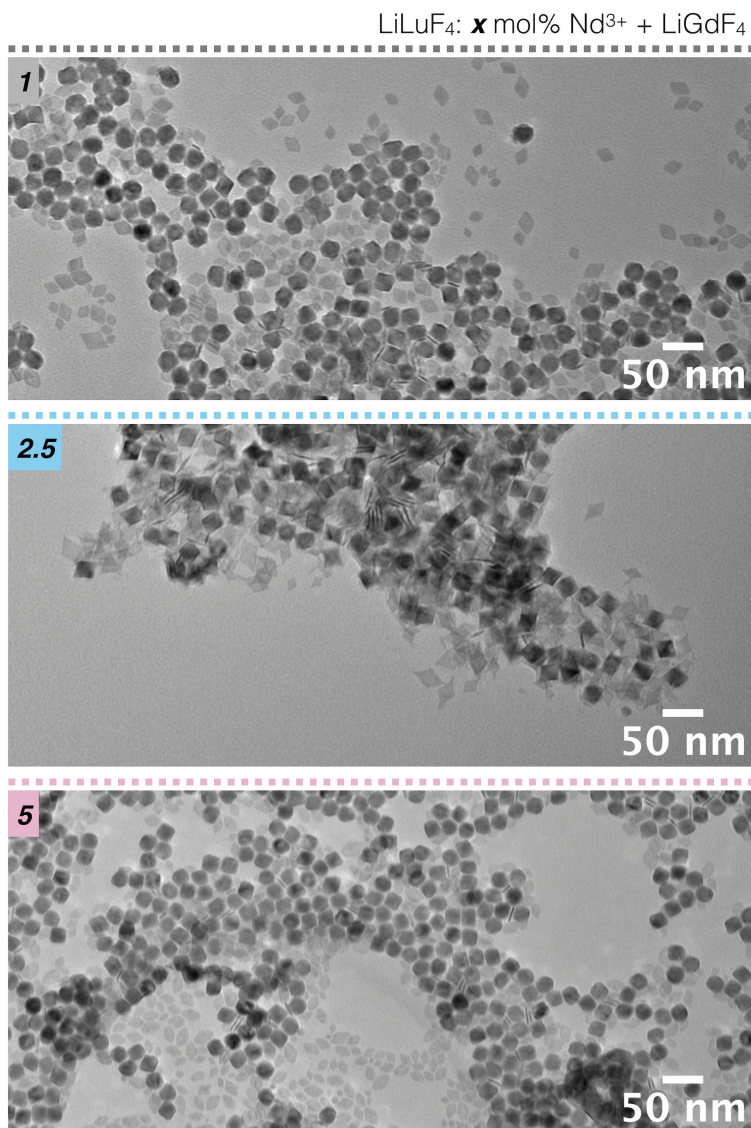

Figure S3. TEM images of LiLuF<sub>4</sub>: **x** mol% Nd<sup>3+</sup> RENPs after attempted shelling with Li<sup>+</sup> and Gd<sup>3+</sup> trifluoroacetate precursors. Although slight size increase and change in the morphology of core RENPs can be noticed, two distinct populations of nanoparticles of different size and morphology are observed. The low contrast nanoparticles are tentatively ascribed to LiGdF<sub>4</sub>.



**PL spectra of  $\text{LiLuF}_4$ :  $x$  mol%  $\text{Nd}^{3+}$ / $\text{LiLuF}_4$  ( $\text{LiYF}_4$ ) RENPs**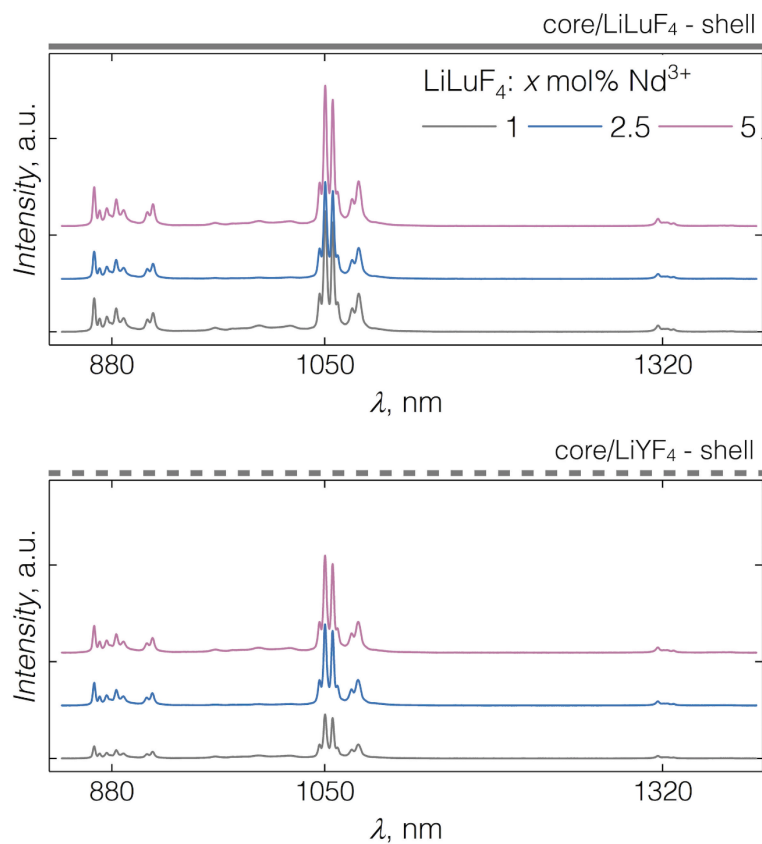

Figure S4. NIR PL spectra of aqueous dispersions of core/ $\text{LiLuF}_4$  and core/ $\text{LiYF}_4$  RENPs excited by 793 nm laser (power density  $49 \text{ W/cm}^2$ ).



Comparison of  $S_r$ Table S1. Comparison of single-band  $\text{Nd}^{3+}$  PL nanothermometers.

| Nanoparticles                                                                                                                                                                               | $\lambda_{\text{ex}}$<br>(nm) | $\sim\lambda_{\text{em}}$ used for LIR<br>(nm)                                                         | Max $S_r$<br>(* $10^{-2} \text{ }^\circ\text{C}^{-1}$ ) | Reference                                                                  |
|---------------------------------------------------------------------------------------------------------------------------------------------------------------------------------------------|-------------------------------|--------------------------------------------------------------------------------------------------------|---------------------------------------------------------|----------------------------------------------------------------------------|
| <b><math>^4\text{F}_{3/2} \rightarrow ^4\text{I}_{9/2}</math></b>                                                                                                                           |                               |                                                                                                        |                                                         |                                                                            |
| $\text{NaYF}_4:\text{Nd}^{3+}$                                                                                                                                                              | 830                           | 867/870                                                                                                | 0.097                                                   | D. Wawrzynczyk et al.<br>( <i>Nanoscale</i> 2012) <sup>[4]</sup>           |
| $\text{LaF}_3:\text{Nd}^{3+}$                                                                                                                                                               | 808                           | 885/863                                                                                                | 0.100                                                   | U. Rocha et al.<br>( <i>ACS Nano</i> 2013) <sup>[5]</sup>                  |
| $\text{NaNdF}_4/\text{NaYF}_4/\text{Nd}^{3+}$                                                                                                                                               | 808                           | $R_2, R_1 \rightarrow Z_1$ in 850-900 range                                                            | 0.110                                                   | Ł. Marciniak et al.<br>( <i>Nanoscale</i> 2017) <sup>[6]</sup>             |
| $\text{Nd}:\text{YAG}$                                                                                                                                                                      | 808                           | 938/946                                                                                                | 0.150                                                   | A. Benayas et al.<br>( <i>Adv. Opt. Mater.</i> 2015) <sup>[7]</sup>        |
| $\text{YVO}_4:\text{Nd}^{3+}$                                                                                                                                                               | 808                           | 879/887                                                                                                | 0.190                                                   | I. E. Kolesnikov et al.<br>( <i>Sens. Actuator B</i> 2016) <sup>[8]</sup>  |
| $\text{LiNdP}_4\text{O}_{12}$                                                                                                                                                               | 808                           | $R_2, R_1 \rightarrow Z_1$ in 850-900 range                                                            | 0.250                                                   | Ł. Marciniak et al.<br>( <i>J. Lumin.</i> 2016) <sup>[9]</sup>             |
| $\text{LaF}_3:\text{Nd}^{3+}$                                                                                                                                                               | 808                           | 865/885                                                                                                | 0.260                                                   | E. Carrasco et al.<br>( <i>Adv. Funct. Mater.</i> 2015) <sup>[10]</sup>    |
| $\text{LiLaP}_4\text{O}_{12}:\text{Nd}^{3+}$<br>$\text{KLaP}_4\text{O}_{12}:\text{Nd}^{3+}$<br>$\text{NaLaP}_4\text{O}_{12}:\text{Nd}^{3+}$<br>$\text{RbLaP}_4\text{O}_{12}:\text{Nd}^{3+}$ | 830                           | $R_2, R_1 \rightarrow Z_1$ in 850-900 range                                                            | 0.312<br>0.098<br>0.104<br>0.108                        | Ł. Marciniak et al.<br>( <i>J. Mater. Chem. C</i> 2016) <sup>[11]</sup>    |
| $\text{LaF}_3:\text{Nd}^{3+}$                                                                                                                                                               | 808                           | 861/863<br>885/865                                                                                     | 0.400<br>0.200                                          | U. Rocha et al.<br>( <i>J. Lumin.</i> 2016) <sup>[12]</sup>                |
| $\text{LiLuF}_4:\text{Nd}^{3+}/\text{LiLuF}_4$                                                                                                                                              | 808                           | 862/866                                                                                                | 0.620                                                   | P. Huang et al.<br>( <i>Adv. Sci.</i> 2019) <sup>[13]</sup>                |
| $\text{LiLuF}_4:\text{Nd}^{3+}/\text{LiLuF}_4$                                                                                                                                              | 793                           | 887/883<br>887/913                                                                                     | 0.580<br>0.580                                          | This work                                                                  |
| <b><math>^4\text{F}_{3/2} \rightarrow ^4\text{I}_{11/2}</math></b>                                                                                                                          |                               |                                                                                                        |                                                         |                                                                            |
| $\text{YVO}_4:\text{Nd}^{3+}$                                                                                                                                                               | 808                           | 1062/1072                                                                                              | 0.150                                                   | I. E. Kolesnikov et al.<br>( <i>Sens. Actuator B</i> 2016) <sup>[8]</sup>  |
| $\text{Y}_2\text{O}_3:\text{Nd}^{3+}$                                                                                                                                                       | 808                           | 1055/1076                                                                                              | 0.150                                                   | I. E. Kolesnikov et al.<br>( <i>Nanotechnology.</i> 2019) <sup>[14]</sup>  |
| $\text{Nd}:\text{KGd}(\text{WO}_4)_2$                                                                                                                                                       | 808                           | 1075.8/1067.6                                                                                          | 0.165                                                   | Ol. A. Savchuk et al.<br>( <i>J. Mat. Chem. C</i> 2016) <sup>[15]</sup>    |
| $\text{SrF}_2:\text{Nd}^{3+}, \text{Y}^{3+}$                                                                                                                                                | 808                           | 1053/1062                                                                                              | 0.180                                                   | M. Quintanilla et al.<br>( <i>Chem. Mater.</i> 2018) <sup>[16]</sup>       |
| $\text{LiYF}_4:\text{Tm}^{3+}, \text{Yb}^{3+}/\text{LiYF}_4/\text{LiYF}_4:\text{Nd}^{3+}$                                                                                                   | 806                           | 1046.4/1056.7                                                                                          | 0.223                                                   | A. Skripka et al.<br>( <i>Adv. Funct. Mater.</i> 2019) <sup>[17]</sup>     |
| $\text{YVO}_4:\text{Nd}^{3+}$                                                                                                                                                               | 808                           | 1063/1070                                                                                              | 0.250                                                   | I. E. Kolesnikov et al.<br>( <i>Sens. Actuator B</i> 2017) <sup>[18]</sup> |
| $\text{YVO}_4:\text{Nd}^{3+}$                                                                                                                                                               | 808                           | 1064.8/1066.3 (integral)<br>1064.8/1063.7 (integral)<br>1064.8/1066.3 (point)<br>1064.8/1063.7 (point) | 0.350<br>0.320<br>0.480<br>0.470                        | I. E. Kolesnikov et al.<br>( <i>J. Lumin.</i> 2017) <sup>[19]</sup>        |
| $\text{YVO}_4:\text{Nd}^{3+}/\text{SiO}_2$                                                                                                                                                  | 808                           | 1064.7/1066.3                                                                                          | 0.400                                                   | I. E. Kolesnikov et al.<br>( <i>J. Alloys Compd.</i> 2018) <sup>[20]</sup> |
| $\text{Y}_2\text{O}_3:\text{Nd}^{3+}$                                                                                                                                                       | 808                           | 1053/1075<br>1057/1080                                                                                 | 0.430<br>0.370                                          | I. E. Kolesnikov et al.<br>( <i>J. Lumin.</i> 2018) <sup>[21]</sup>        |
| $\text{LiLuF}_4:\text{Nd}^{3+}/\text{LiLuF}_4$                                                                                                                                              | 793                           | 1047/1056<br>1053/1056                                                                                 | 0.480<br>0.480                                          | This work                                                                  |
| <b><math>^4\text{F}_{3/2} \rightarrow ^4\text{I}_{13/2}</math></b>                                                                                                                          |                               |                                                                                                        |                                                         |                                                                            |
| $(\text{Gd}_{0.980}\text{Nd}_{0.020})_2\text{O}_3$                                                                                                                                          | 808                           | $R_2, R_1 \rightarrow Z_1$ in 1250-1500 range                                                          | 0.230                                                   | S. Balabhadra et al.<br>( <i>J. Lumin.</i> 2016) <sup>[22]</sup>           |
| $\text{LiLuF}_4:\text{Nd}^{3+}/\text{LiLuF}_4$                                                                                                                                              | 793                           | 1322/1328                                                                                              | 0.490                                                   | This work                                                                  |

**S<sub>r</sub> of pure PL ratio nanothermometer**

PL ratio nanothermometry, based on two emission bands ( $I_n$  and  $I_m$ ) stemming from thermally coupled electronic levels, is described by the Boltzmann distribution:

$$\Delta = \frac{I_n}{I_m} = B \exp\left(-\frac{\Delta E}{k_B T}\right)$$

where  $\Delta E$  is the energy gap separating the thermally coupled electronic levels,  $k_B$  is Boltzmann's constant,  $T$  is temperature and  $B$  is:

$$B = \frac{c_n(\nu) A_n g_n h \nu_n}{c_m(\nu) A_m g_m h \nu_m}$$

here,  $A_i$  ( $i = n, m$ ) and  $g_i$  are the spontaneous emission rates and degeneracies of the emitting thermally coupled electronic states,  $c_i(\nu)$  is the spectral response of the experimental system at the emission frequency  $\nu_i$ , and  $h$  is Planck's constant.

Taking the general expression of relative sensitivity for a thermometer, we then can calculate the  $S_r$  value attainable for a given PL ratio governed nanothermometric system as:

$$S_R = \frac{1}{\Delta} \left| \frac{\Delta}{T} \right| = \frac{\Delta E}{k_B T^2}$$

In the case of the studied  $\text{Nd}^{3+}$  doped RENPs, the thermally coupled energy levels of  $\text{Nd}^{3+}$  are  $^4\text{F}_{3/2}$  ( $R_1$ ) and  $^4\text{F}_{3/2}$  ( $R_2$ ) with  $\Delta E \sim 55 \text{ cm}^{-1}$  (Figure S5). This would result in  $S_r \sim 0.09 \text{ \%} \cdot ^\circ\text{C}^{-1}$  at  $20 \text{ }^\circ\text{C}$  for any purely PL ratio based thermometric parameter defined for our RENPs.

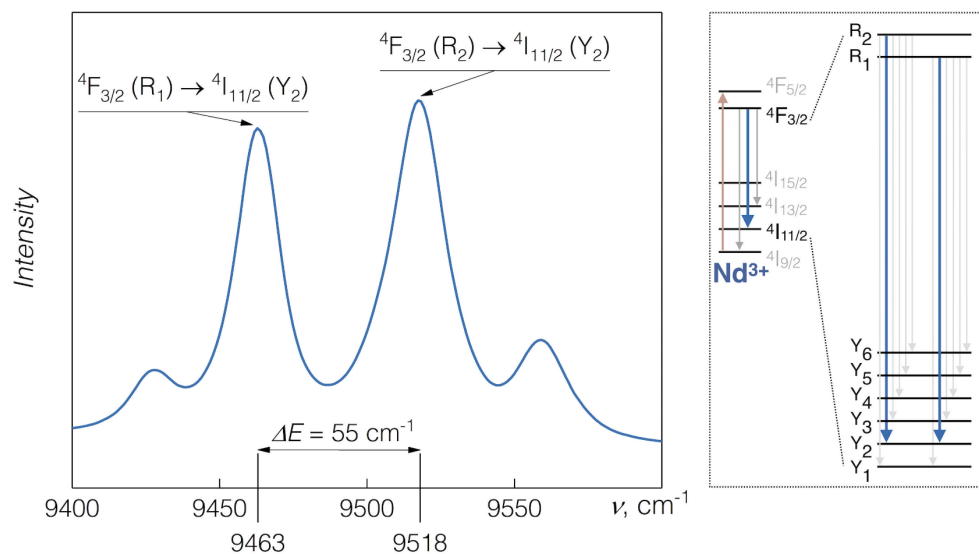

Figure S5. PL spectra of RENPs under 793 nm excitation, showing PL band around 1050 nm ( ${}^4F_{3/2} \rightarrow {}^4I_{11/2}$  radiative transition; see scheme on the right) with its Stark structure. From the peak positions of the most intense Stark bands, an energy gap  $\Delta E \sim 55 \text{ cm}^{-1}$  between the  $R_2$  and  $R_1$  sub-levels of  ${}^4F_{3/2}$  electronic state can be calculated.

**Quantum efficiency of NIR detector**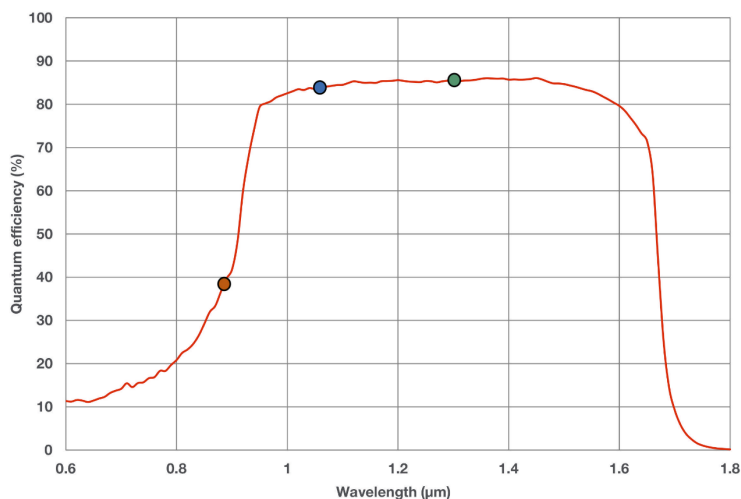

Figure S6. Quantum efficiency of the InGaAs NIR detector used in our NIR spectrum acquisition setup. Approximate positions of  $\text{Nd}^{3+}$  radiative transitions are labeled with dots: red -  $^4F_{3/2} \rightarrow ^4I_{9/2} \sim 880 \text{ nm}$ , blue -  $^4F_{3/2} \rightarrow ^4I_{11/2} \sim 1050 \text{ nm}$ , and green -  $^4F_{3/2} \rightarrow ^4I_{13/2} \sim 1320 \text{ nm}$ . Data was adapted from the specification provided by the manufacturer (<https://andor.oxinst.com/assets/uploads/products/andor/documents/Andor-iDus-InGaAs-1.7-Specifications.pdf>)

## Repeatability of RENPs as NIR nanothermometers

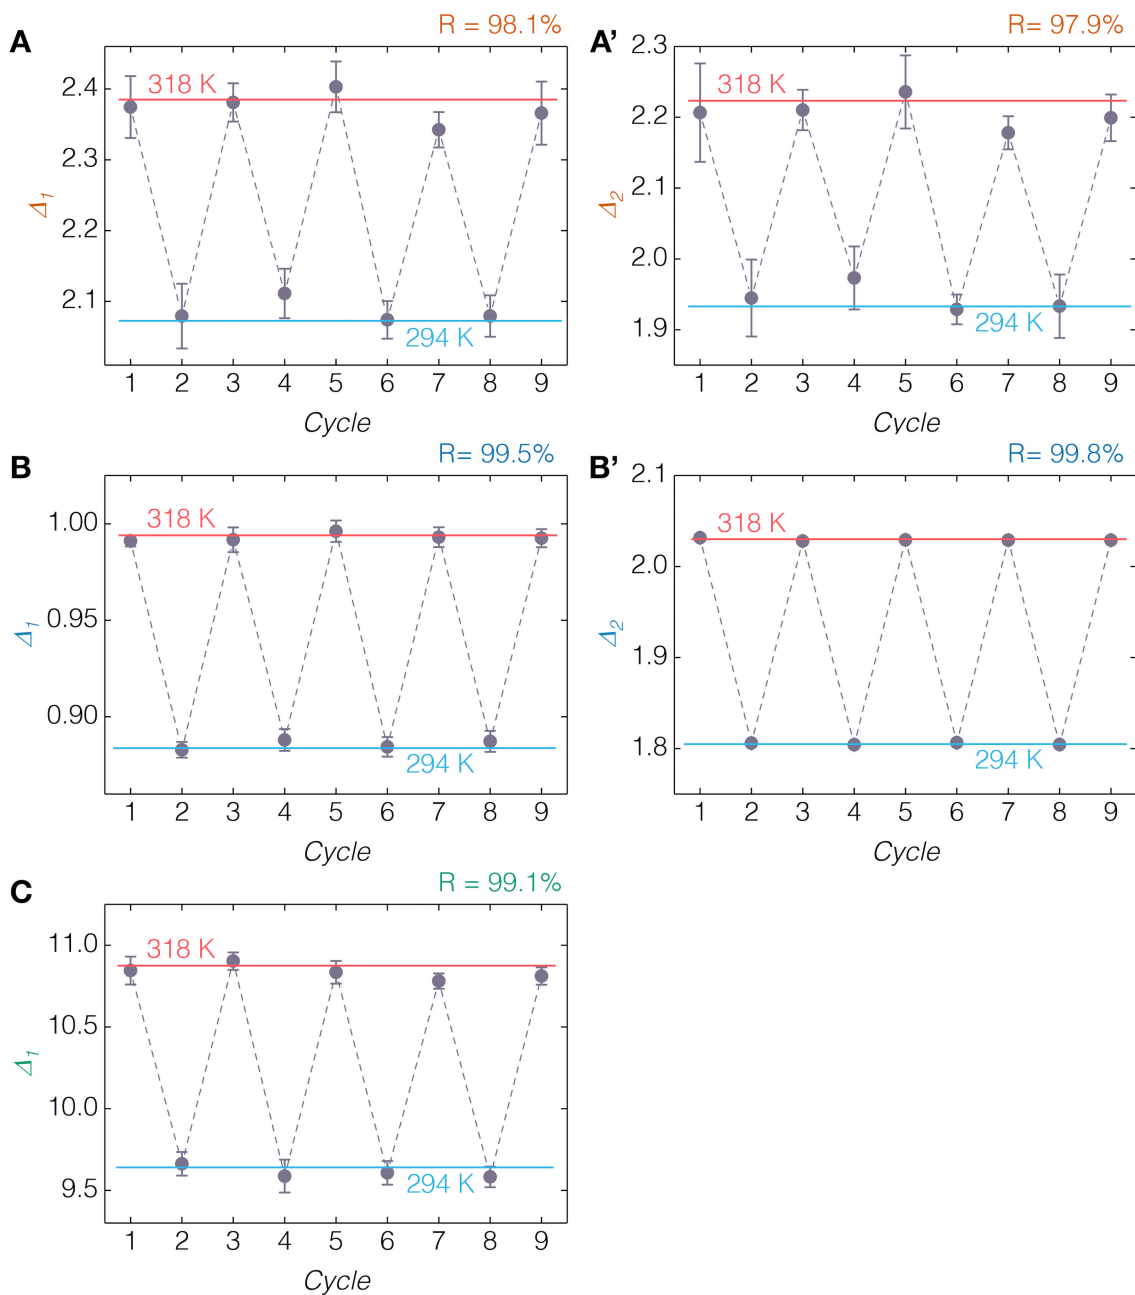

Figure S7. Repeatability parameter,  $R$ , for the different thermometric parameters of RENPs, evaluated from measuring temperature following multiple heating-cooling cycles. A –  $\Delta_1$  and A' –  $\Delta_2$  of the  ${}^4F_{3/2} \rightarrow {}^4I_{9/2}$  emission; B –  $\Delta_1$  and B' –  $\Delta_2$  of the  ${}^4F_{3/2} \rightarrow {}^4I_{11/2}$  emission; C –  $\Delta_1$  of the  ${}^4F_{3/2} \rightarrow {}^4I_{13/2}$  emission.

### Invariability of 1050 nm emission

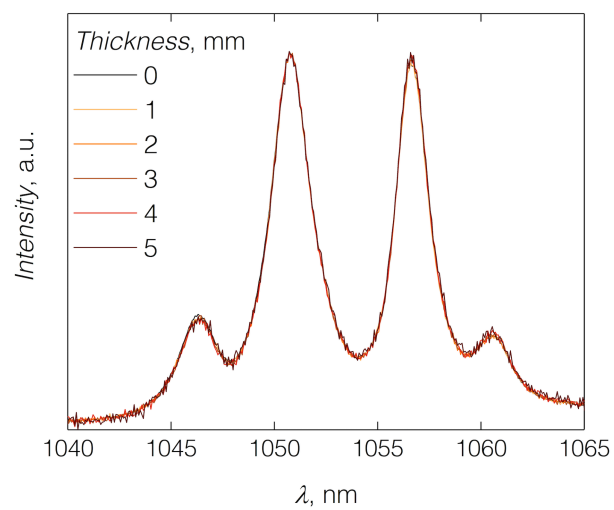

Figure S8. PL spectra (normalized to maximum of intensity) of RENPs under 793 nm excitation, collected before and after propagating through pork fat tissue of different thickness (from 1 to 5 mm).

**$S_r$  of  $\text{LiLuF}_4$ :  $x$  mol%  $\text{Nd}^{3+}/\text{LiLuF}_4$  ( $\text{LiYF}_4$ ) RENPs**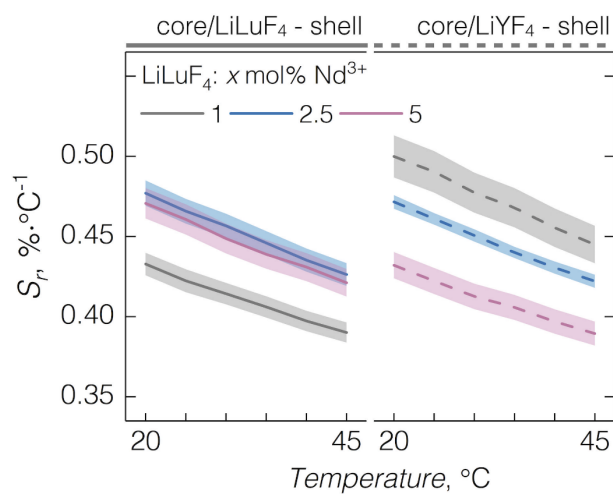

Figure S9.  $S_r$  values of thermometric parameter  $\Delta_2$  of the  $^4\text{F}_{3/2} \rightarrow ^4\text{I}_{11/2}$  emission for different  $\text{LiLuF}_4$ :  $x$  mol%  $\text{Nd}^{3+}/\text{LiLuF}_4$  ( $\text{LiYF}_4$ ) RENPs.

**PL transmission through pork fat tissue**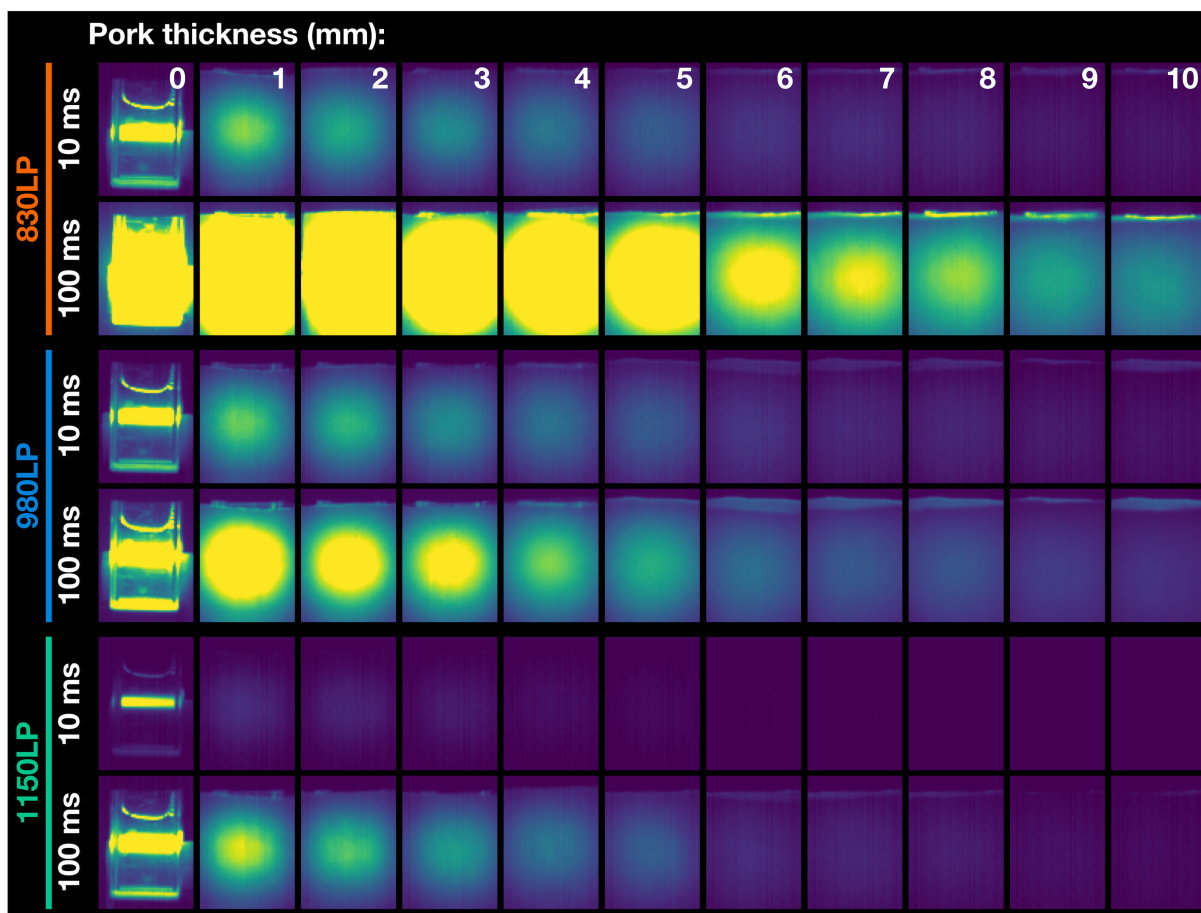

Figure S10. NIR images of the PL emission of RENPs excited with a 793 nm laser and observed through varying thickness of pork fat tissue. Different LP filters were applied to first exclude contributions of PL around 880 (980LP) and then 1050 nm (1150LP). Images were acquired with 10 and 100 ms of exposure time.



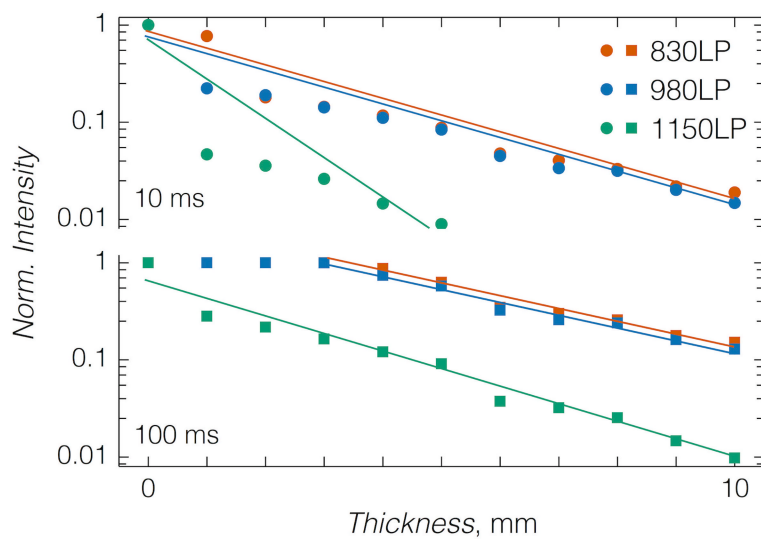

Figure S11. Intensity change around the center of the PL trace as the emitted light was passing through increasing thickness of pork fat tissue. Intensities are normalized to the “no tissue” initial signal. Lines are guides for the eye.

**Heating-cooling characterization**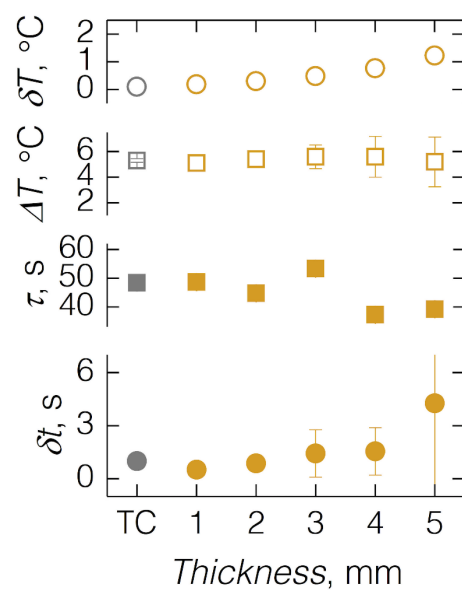

Figure S12. Representation of thermal ( $\delta T$ ) and temporal ( $\delta t$ ) uncertainty changes with increasing thickness of pork fat tissue in the heating-cooling *ex vivo* experiment.  $\Delta T$  is temperature increase induced by the 980 nm laser and  $\tau$  is the relaxation time obtained from the single-exponential fit of the cooling curves (Fig. 6 of the main text). Grey points indicate the respective value obtained based on the contact TC measurement.

## References

- [1] T. Cheng, R. Marin, A. Skripka, F. Vetrone, *J. Am. Chem. Soc.* **2018**, 140, 12890.
- [2] N. Bogdan, F. Vetrone, G. A. Ozin, J. A. Capobianco, *Nano Lett.* **2011**, 11, 835.
- [3] C. D. S. Brites, A. Millán, L. D. Carlos, in *Handbook on the Physics and Chemistry of Rare Earths*, Vol. 49 (Eds: B. Jean-Claude, P. Vitalij K), Elsevier **2016**, p. 339.
- [4] D. Wawrzynczyk, A. Bednarkiewicz, M. Nyk, W. Strek, M. Samoc, *Nanoscale* **2012**, 4, 6959.
- [5] U. Rocha, C. Jacinto da Silva, W. Ferreira Silva, I. Guedes, A. Benayas, L. Martinez Maestro, M. Acosta Elias, E. Bovero, F. C. van Veggel, J. A. Garcia Sole, D. Jaque, *ACS Nano* **2013**, 7, 1188.
- [6] L. Marciniak, A. Pilch, S. Arabasz, D. Jin, A. Bednarkiewicz, *Nanoscale* **2017**, 9, 8288.
- [7] A. Benayas, B. del Rosal, A. Pérez-Delgado, K. Santacruz-Gómez, D. Jaque, G. A. Hirata, F. Vetrone, *Adv. Opt. Mater.* **2015**, 3, 687.
- [8] I. E. Kolesnikov, E. V. Golyeva, M. A. Kurochkin, E. Lähderanta, M. D. Mikhailov, *Sens. Actuators B-Chem.* **2016**, 235, 287.
- [9] L. Marciniak, K. Prorok, A. Bednarkiewicz, A. Kowalczyk, D. Hreniak, W. Strek, *J. Lumin.* **2016**, 176, 144.
- [10] E. Carrasco, B. del Rosal, F. Sanz-Rodríguez, Á. J. de la Fuente, P. H. Gonzalez, U. Rocha, K. U. Kumar, C. Jacinto, J. G. Solé, D. Jaque, *Adv. Funct. Mater.* **2015**, 25, 615.
- [11] Ł. Marciniak, A. Bednarkiewicz, D. Hreniak, W. Strek, *J. Mater. Chem. C* **2016**, 4, 11284.
- [12] U. Rocha, C. Jacinto, K. U. Kumar, F. J. López, D. Bravo, J. G. Solé, D. Jaque, *J. Lumin.* **2016**, 175, 149.
- [13] P. Huang, W. Zheng, D. Tu, X. Shang, M. Zhang, R. Li, J. Xu, Y. Liu, X. Chen, *Adv. Sci.* **2019**, 6, 1802282.
- [14] I. E. Kolesnikov, A. A. Kalinichev, M. A. Kurochkin, D. V. Mamonova, E. Yu. Kolesnikov, E. Lähderanta and M. D. Mikhailov, *Nanotechnology*, 2019, **30**, 1345501.
- [15] O. Savchuk, J. J. Carvajal, L. G. De la Cruz, P. Haro-Gonzalez, M. Aguilo, F. Diaz, *J. Mater. Chem. C* **2016**, 4, 7397.
- [16] M. Quintanilla, Y. Zhang, L. M. Liz-Marzán, *Chem. Mater.* **2018**, 30, 2819.
- [17] A. Skripka, V. Karabanovas, G. Jarockyte, R. Marin, V. Tam, M. Cerruti, R. Rotomskis, F. Vetrone, *Adv. Funct. Mater.* **2019**, 29, 1807105.
- [18] I. E. Kolesnikov, E. V. Golyeva, A. A. Kalinichev, M. A. Kurochkin, E. Lähderanta, M. D. Mikhailov, *S. Actuators B-Chem.* **2017**, 243, 338.
- [19] I. E. Kolesnikov, A. A. Kalinichev, M. A. Kurochkin, D. V. Mamonova, E. Y. Kolesnikov, A. V. Kurochkin, E. Lähderanta, M. D. Mikhailov, *J. Lumin.* **2017**, 192, 40.
- [20] I. E. Kolesnikov, M. A. Kurochkin, A. A. Kalinichev, D. V. Mamonova, E. Y. Kolesnikov, A. V. Kurochkin, E. Lähderanta, M. D. Mikhailov, *J. Alloy. Compd.* **2018**, 734, 136.
- [21] I. E. Kolesnikov, A. A. Kalinichev, M. A. Kurochkin, D. V. Mamonova, E. Y. Kolesnikov, A. V. Kurochkin, E. Lähderanta, M. D. Mikhailov, *J. Lumin.* **2018**, 204, 506.
- [22] S. Balabhadra, M. L. Debasu, C. D. S. Brites, J. Rocha, L. D. Carlos, *J. Lumin.* **2016**, 180, 25.
